# Supplementary material for: Putative carboxylesterase gene identification and their expression patterns in Hyphantria cunea (Drury)
Source: PeerJ journal article supplement (doi:10.7717/peerj.10919), 2021-03-02

A

## E-value Distribution

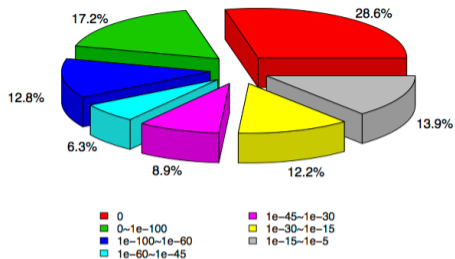

B

## Similarity Distribution

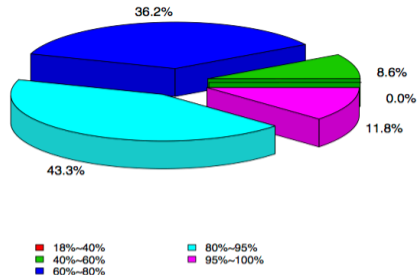

C

## Species classification

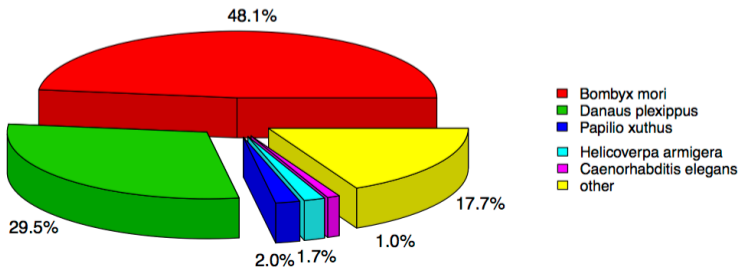

Supplement: peerj-49228-Fig.S1.pdf [file peerj-49228-Fig.S1.pdf]
