# Supplementary material for: Putative carboxylesterase gene identification and their expression patterns in Hyphantria cunea (Drury)
Source: PeerJ journal article supplement (doi:10.7717/peerj.10919), 2021-03-02
Supplement: peerj-49228-Fig.S3.pdf [file peerj-49228-Fig.S3.pdf]

## KOG Function Classification

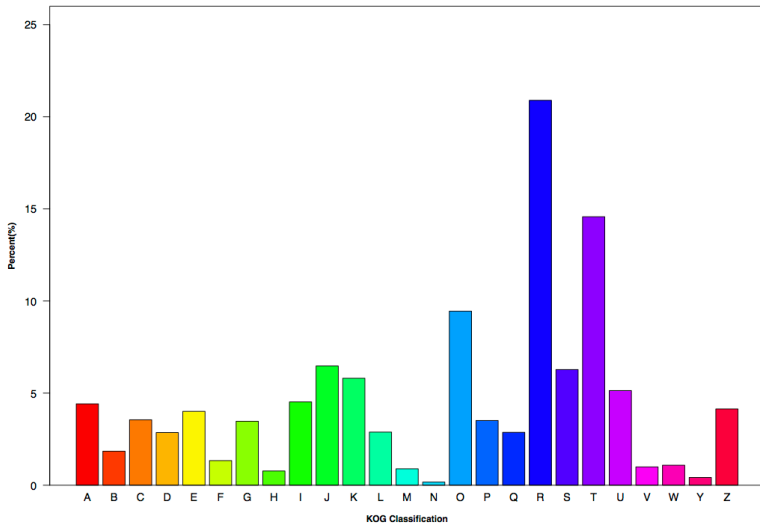

- (A) RNA processing and modification
- (B) Chromatin structure and dynamics
- (C) Energy production and conversion
- (D) Cell cycle control, cell division, chromosome partitioning
- (E) Amino acid transport and metabolism
- (F) Nucleotide transport and metabolism
- (G) Carbohydrate transport and metabolism
- (H) Coenzyme transport and metabolism
- (I) Lipid transport and metabolism
- (J) Translation, ribosomal structure and biogenesis
- (K) Transcription
- (L) Replication, recombination and repair
- (M) Cell wall/membrane/envelope biogenesis
- (N) Cell motility
- (O) Posttranslational modification, protein turnover, chaperones
- (P) Inorganic ion transport and metabolism
- (Q) Secondary metabolites biosynthesis, transport and catabolism
- (R) General function prediction only
- (S) Function unknown
- (T) Signal transduction mechanisms
- (U) Intracellular trafficking, secretion, and vesicular transport
- (V) Defense mechanisms
- (W) Extracellular structures
- (Y) Nuclear structure
- (Z) Cytoskeleton
