# Supplementary material for: Putative carboxylesterase gene identification and their expression patterns in Hyphantria cunea (Drury)
Source: PeerJ journal article supplement (doi:10.7717/peerj.10919), 2021-03-02
Supplement: peerj-49228-Fig.S5.pdf [file peerj-49228-Fig.S5.pdf]

### A

HcunCXE1 MSSNMKYGKRIIVLFSLFVTLNLDQPAPEVQTEQGITLSGKINGDGSFFEYLGIPYATTNSSIRFKAPLPPPSWQGVYKAVDEIYOCPQMNP  
 SinfCXE18 ---MIKFKGRILFLTLFAMNLDQPAPEVTEQGITLSGKISTDGSFFEYVGIPIYATTNSSIRFKAPLPPPSWQGVYKAVDEIYOCPQS-S

HcunCXE1 IFGVVGNEDCLKINVYVPAKIIKLSALPVMVYIHGGFTICNGGKLLYAPDFLIKHDVILVTFNYRLGALGFLCLGIKEAPGNAGIKDQIA  
 SinfCXE18 FIVGVVGNEDCLKINVYVPA-LVKKLLPVMVYIHGRAFLIGSGGKFLYAPDFLVKHNVILVTFNYRLGALGFLCLGIKEAPGNAGIKDQIA

HcunCXE1 ALKWIKKNIAGFGGDPNNVTIFGQSAGATSAASLILVSNITDGLFHKAITQSGISTSSWAINRQPLWVASLIAKDLGYETKNPEEIIYQILS  
 SinfCXE18 ALRWIKRNIAGFGGDPDNTVIFGQSAGATSVSLILASNAIQGLFHKITIVQSGSSISSWAINRQPLWVASLIAKDLGYDTPKDPKEIFEIIFS

HcunCXE1 KTSYKSLIKAKPKKPLGLMYFDTCMLHYPCVEQDIEGEEAVITDFPFLNLFENIPKKNIPVLYGTTSKEGIFLIPDDTKESLAARDVKYIFA  
 SinfCXE18 KLPYKSLIKAKPKKPLGLMYFDTCMLHYPCVEQDIEGEEAVITDYPYILSNPK-NIPALYGTTSREGIFLIPDDTKESLAARDARYIFA

HcunCXE1 SDLQFPSEEEAANVSQMAREYFYGDKKLSFDVHDKIADLNTELYFEIPAILESQTLVNNTKAKVYNYFFNYDGGRNILKSLVGLFGFKTE  
 SinfCXE18 SDLEFSSSEEAARVSQMMREFYFGKKNISFEVQNIITDLNTQLYFEAPAILESLLVKNTKANVYNYFFNYAGGRNLFKFS--GFWNE

HcunCXE1 SGAMVHGDELMYLFKGLVWPFPIKKNQQAIIINIMTKLWTFNFAKYGEPTLDDIVPIKWEPTKESARFLYIDDNIRMGSSFPNPTAFHLWKNI  
 SinfCXE18 AGACHSDEILYLFKGNINWPFPIKKNQQAIIINIMTKLWTFNFAKYGDPTPTNDIPVRWEPTKDDMKFLYIDQILKMGRTNPEANRLWKNI

HcunCXE1 YEKYRKKKNKPNDFMK  
 SinfCXE18 YEKYRKKKNKPNDF-- 73.9%

### B

SinfCXE1 MKRTMKWLVLLSLIAARMVQOPTQFVRRSGLVRRGTVSRNGKLFQYFGIPYATVDEINRFQAPLPPPTWTGIFEAVDENTWCPQHSGG-I  
 HcunCXE9 ---MKWVALVFLIAAGVVRQPSVVRTTSGYIRGAISHNGRFIEYFGIPYATVNESNRFQAPLPPPTWGDGILNALNENTWCPQSSVGGPI

SinfCXE1 IIGEPNCKLNIYTPTRITKPLPVMVYIHGGCFFSGTGSEFLYGGDFLAFENNVIEVGINYRLSVEGFLCLGIKEAPGNAGLKDQIAALKW  
 HcunCXE9 VIGEPNCKLNIYSEAOYTKLLPVMVYIHGGCFFSGTGAPFLYGGDFEPEHDVILVGISYRLSVEGFLCLGIKEAPGNAGLKDVVAALKW

SinfCXE1 IQENIEAFGGDPNDVTLFGESAGAVSISFMMISPAAKGLFHKAILQSGSSLAPWALQHDPIETASALVKKLGITKDEPRETYNILSNKTA  
 HcunCXE9 IQENIKSEFGGDPNKVTLFGESAGAVSISFMMISPAAKGLFHKAILQSGSSLAPWALQHDPIKAAMSLVNLKLGYSANNEKDIYNIISKKTIT

SinfCXE1 KEILTITINKFEERYCLAENKLVPCVEKPIKQVEPVVTDYPADIIKSNNTKVPMIIGYTDKEGIIYFVSADYGTSLKNNSGIIDPMKTLQ  
 HcunCXE9 KELINTITHYEEKFCVAETDIFVPCVERHLEGEPIITDYPANILSDNYTKVPMIIGYTNHEGIIYFVSADYGTSLGNNTRAIDPARVLQ

SinfCXE1 EDLHFPSELDNKCTAEATKRHYFSSYAEGLITDMVDLYSDVHIFKPLVLEAELYTRTAQPIYYYLFRYSGLRNMPKIVSGFQFLVNGAS  
 HcunCXE9 RDLQFPSENDNKCTVDKIRRHYPSPKHEMIMDMVNLYSDFHIFKPLVLESELYRSTSDQPIYYYLFRYSGLRNMPKIVSGFGLSTGAS

SinfCXE1 HADELFYLFKPHAFPLIHS-AEKTMIGRMVTMWTNFAKYTDPTFRPSPLTFRWRPSRRONPTALIIDAOVSTAPLWEESSVRLWNDTYN  
 HcunCXE9 HADELFYLFKPHSFPLEHRRFLSEMIKRMLTMTNFAKYSPTFRHRSRLFRWRNPSKRFNPTSLVIDSQISTAPMWDEDSVRLWNDTYN

SinfCXE1 KYRRKLYGKLFQHYTDVLADGLPTS 71.3%  
 HcunCXE9 KYRRKLYGKLFQHY-----

### C

SinfCXE13 -MSLRLFLFLSIAGLVFAQANFTVRVAQGLLQGTWKVSTKGRSYASFCQVPYARPHIGKYRFREPOHLKPLWGMWDATRPLSACLQYEP  
 HcunCXE7 -MIFKLFLLVGLVAAQOSINPTIRIPHIGILQGAWKVSTKGRSYASFCQVPYARPHIGKLRFREPOQLKPWTGMWDATKPLSACLQYNP  
 CmedCXE5 MAALRFLSFLLLVALAAGQGSNPFVVRVAHGLLQGSWKVSTNGRTYASFCQIPYARPEVIGKYRFREPOQLKPWTGTWDATKPLSACLQYDP

SinfCXE13 FVKSIIGSENCIFVNVYTPKMNAAGANLPVMVFIHGGAFMYGTGGIYDASNIMDMDMVMVVTINRYRLGPLGFLSTGDEIAPGNNGLKDQAF  
 HcunCXE7 FEKSLYIGSENCIYLNIHTPKLQPGAMMPVMVFIHGGAFMYGEGSIYDAFNIMDMDMVMVVTINRYRLGPLGFLSTGDDVIIPGNGLKDQSAFA  
 CmedCXE5 EDKSIIGSENCIFVNVYTPKLNAGSNLPVVMVFIHGGAFMYGTSSLYGAEFMDRDMVIVTVNYRLGPLGFLSSGDEIAPGNAGLKDQAF

SinfCXE13 IHWIKNNIIMFGGNEFSITLIGCSAGGASVHYHYMSPLSRGTFARGIAYSGSALTEWTHSIPAEKARTLASIVGCPTTTNKEEMMECLKY  
 HcunCXE7 IHWIKNNIIMFGGNEFSITLIGCSAGGASVHYHYLSPLSRGTFARGIAFSGSASFASWTHSIPAEKTKTLASIVGCPTGSSKEILECLKY  
 CmedCXE5 IRWVQNNIIMFGGNEFSVTLIGCSAGGASVHYHYLSPLSRGTGKGFARGIAFSGSASFATWTHAVKAAQKARGLASIVGCPTATTREMVDCLYK

SinfCXE13 RPAEVIIVNAQIFEMFDWKVH-MFTFTFTEPVVHAPGVREPFYQYYPYHATRSGSMNIPPIIISVTFSEGLYPAAAAYQETDPTIIPDLEANWNC  
 HcunCXE7 RPAEVIIVNAQADMFWDKVN-LFTFTFTEPVAHAWGVREPFYQYYPYHATRSGSMNIPPIIASVTFSEGLYPAAAAYQTDPTIIPDLEANWDEL  
 CmedCXE5 RPAEVLVDAQIFEMFDWKPHAYFTFTFTEPVAEGPTVRDPFLYQYYPYIAAKTGGMHPPLPIIASITSEGLYPAAAAYHRDPNALQLETRWNE

SinfCXE13 AANIFEYNDTLFLNIRNEVAMKIKCHYLGGKPVSCQETFAQLVQALS DRLFVADVGTAKLHAAKSGQPIYVYRYAFRGATSLSNLMAHND  
 HcunCXE7 AANIFEYNDTLFINRRVEVAQAIAKQYLLGGKPVSCQDFTFPQLVQALGDRLFVANVGLAQTHAAKSGQPIYVYRYAYRGSFSLSDVISQSK  
 CmedCXE5 ASNIFEYNDTLFVHQRASVAACIKKYLNNKPVSCATFTFPQLVQALGDRLFGSEVGRLAQTHAQRSGQPIYVYRYSHRGSISLSNFLANN

SinfCXE13 ANYGVSHADDVLRIFKYPGLASNNPQDVAMTEGLINMVSFSTTGIPKLIINDGPAWDVVKPCAFELHYLDILSPTSMEMNSSTDFGQRSF  
 HcunCXE7 VNYGVSHGDDVFSIFKFPFELQVKSAAHAAMVDALINIVYSFSTSGIPKLIQGGPEWLPVVRPCAAELDYLDILSPTSMEMKSSSDFGLKSF  
 CmedCXE5 DNYGVSHADDVIAMFKFGLDFTTTDDKKNMALLDMVYSFATTGVPRLSNTGPTWLPVVTAGSEELNYLEISSPTKHEMKTSTDFGHKSF

SinfCXE13 WDSLGFENENYQTYLKDEL 74.6%  
 HcunCXE7 WDSLGFENENYRNSIKDEL  
 CmedCXE5 WDSLGFENDRFHYSIRDEL 65.0%
