# Supplementary material for: Putative carboxylesterase gene identification and their expression patterns in Hyphantria cunea (Drury)
Source: PeerJ journal article supplement (doi:10.7717/peerj.10919), 2021-03-02

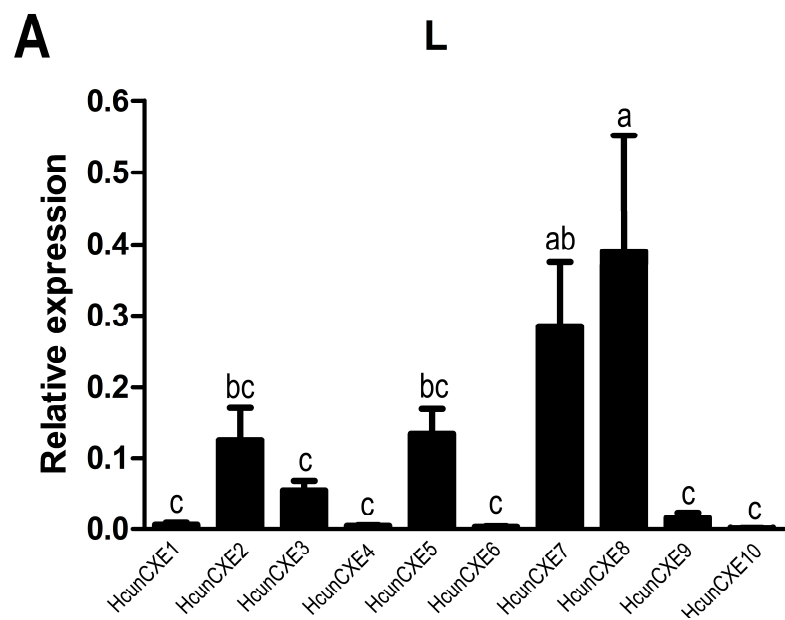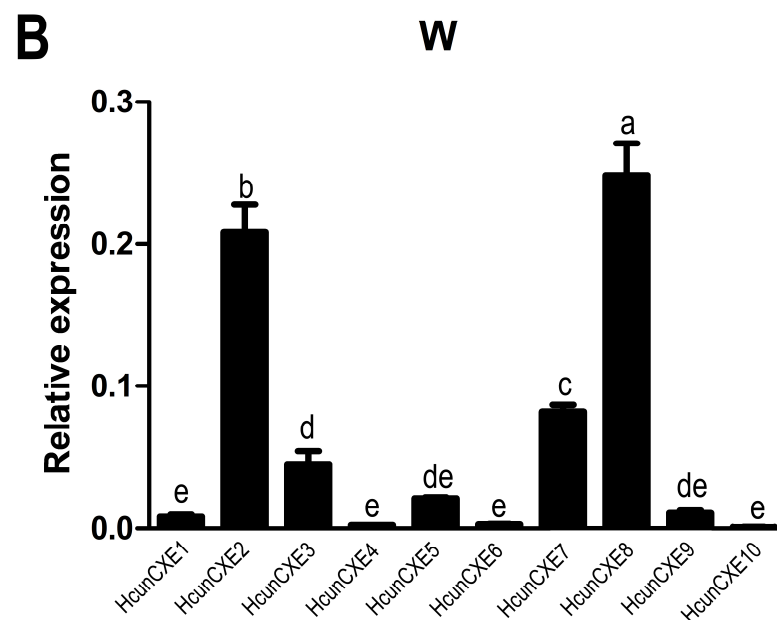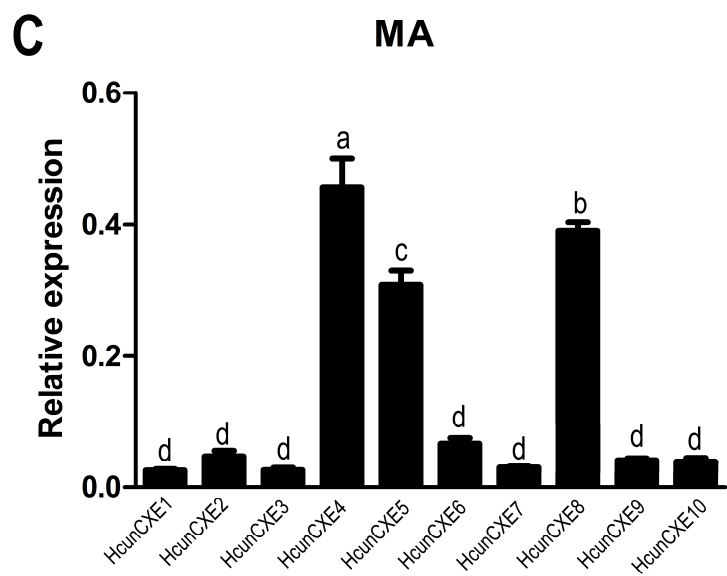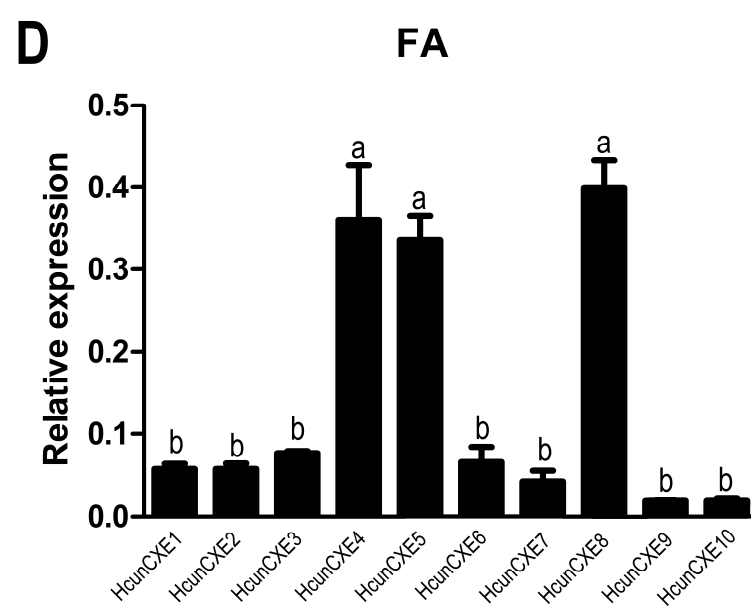

Supplement: peerj-49228-Fig.S6.pdf [file peerj-49228-Fig.S6.pdf]
