# Supplementary material for: Putative carboxylesterase gene identification and their expression patterns in Hyphantria cunea (Drury)
Source: PeerJ journal article supplement (doi:10.7717/peerj.10919), 2021-03-02
Supplement: Raw_data_supplementary_material_2.zip [file Raw_data_supplementary_material_2.zip]

HcunCXE1

1 2 3 4 5

HcunCXE2

1 2 3 4 5

HcunCXE3

1 2 3 4 5

HcunCXE4

1 2 3 4 5

HcunCXE5

1 2 3 4 5

HcunCXE6

1 2 3 4 5

HcunCXE7

1 2 3 4 5

HcunCXE8

1 2 3 4 5

HcunCXE9

1 2 3 4 5

HcunCXE10

1 2 3 4 5

L1: Thoraxes

L2: Abdomens

L3: Pupae

L4: Larvae

L5: Negative control
