# Supplementary material for: Putative carboxylesterase gene identification and their expression patterns in Hyphantria cunea (Drury)
Source: PeerJ. 2021 Mar 2;9:e10919. doi: 10.7717/peerj.10919 (PMC7934681; doi:10.7717/peerj.10919)
Supplement: Supplemental Information 4 [file peerj-09-10919-s004.xlsx]

## Sheet: Info
Model	#Param	BIC	AICc	lnL	Invariant	Gamma	Freq A	Freq R	Freq N	Freq D	Freq C	Freq Q	Freq E	Freq G	Freq H	Freq I	Freq L	Freq K	Freq M	Freq F	Freq P	Freq S	Freq T	Freq W	Freq Y	Freq V
LG+G+I	181	164821	163225	-81430.9	0.00600912	1.19118	0.079066	0.055941	0.041977	0.053052	0.012937	0.040767	0.071586	0.057337	0.022355	0.062157	0.099081	0.0646	0.022951	0.042302	0.04404	0.061197	0.053287	0.012066	0.034155	0.069147
LG+G	180	164861	163274	-81456.4	n/a	1.0609	0.079066	0.055941	0.041977	0.053052	0.012937	0.040767	0.071586	0.057337	0.022355	0.062157	0.099081	0.0646	0.022951	0.042302	0.04404	0.061197	0.053287	0.012066	0.034155	0.069147
LG+G+I+F	200	164876	163114	-81356	0.00596006	1.19198	0.0644723	0.0399808	0.051538	0.0553105	0.0128146	0.0311184	0.0584842	0.0729755	0.0214376	0.0556299	0.0906605	0.0596419	0.0233737	0.0554702	0.0634144	0.0646121	0.0537536	0.0144713	0.0438132	0.0670273
LG+G+F	199	164918	163164	-81382.2	n/a	1.07131	0.0644723	0.0399808	0.051538	0.0553105	0.0128146	0.0311184	0.0584842	0.0729755	0.0214376	0.0556299	0.0906605	0.0596419	0.0233737	0.0554702	0.0634144	0.0646121	0.0537536	0.0144713	0.0438132	0.0670273
WAG+G+I+F	200	165020	163258	-81428.1	0.00587549	1.38359	0.0644723	0.0399808	0.051538	0.0553105	0.0128146	0.0311184	0.0584842	0.0729755	0.0214376	0.0556299	0.0906605	0.0596419	0.0233737	0.0554702	0.0634144	0.0646121	0.0537536	0.0144713	0.0438132	0.0670273
WAG+G+F	199	165067	163313	-81456.7	n/a	1.2427	0.0644723	0.0399808	0.051538	0.0553105	0.0128146	0.0311184	0.0584842	0.0729755	0.0214376	0.0556299	0.0906605	0.0596419	0.0233737	0.0554702	0.0634144	0.0646121	0.0537536	0.0144713	0.0438132	0.0670273
WAG+G+I	181	165204	163609	-81622.8	0.00604731	1.40732	0.0866279	0.043972	0.0390894	0.0570451	0.0193078	0.0367281	0.0580589	0.0832518	0.0244313	0.048466	0.086209	0.0620286	0.0195027	0.0384319	0.0457631	0.0695179	0.0610127	0.0143859	0.0352742	0.0708956
WAG+G	180	165255	163668	-81653.3	n/a	1.25934	0.0866279	0.043972	0.0390894	0.0570451	0.0193078	0.0367281	0.0580589	0.0832518	0.0244313	0.048466	0.086209	0.0620286	0.0195027	0.0384319	0.0457631	0.0695179	0.0610127	0.0143859	0.0352742	0.0708956
rtREV+G+I+F	200	165506	163743	-81670.7	0.0055624	1.20268	0.0644723	0.0399808	0.051538	0.0553105	0.0128146	0.0311184	0.0584842	0.0729755	0.0214376	0.0556299	0.0906605	0.0596419	0.0233737	0.0554702	0.0634144	0.0646121	0.0537536	0.0144713	0.0438132	0.0670273
rtREV+G+F	199	165546	163792	-81696	n/a	1.09728	0.0644723	0.0399808	0.051538	0.0553105	0.0128146	0.0311184	0.0584842	0.0729755	0.0214376	0.0556299	0.0906605	0.0596419	0.0233737	0.0554702	0.0634144	0.0646121	0.0537536	0.0144713	0.0438132	0.0670273
JTT+G+I+F	200	165906	164143	-81870.7	0.00629252	1.2384	0.0644723	0.0399808	0.051538	0.0553105	0.0128146	0.0311184	0.0584842	0.0729755	0.0214376	0.0556299	0.0906605	0.0596419	0.0233737	0.0554702	0.0634144	0.0646121	0.0537536	0.0144713	0.0438132	0.0670273
JTT+G+I	181	165934	164338	-81987.4	0.00632317	1.245	0.0769	0.0511	0.0425	0.0513	0.0203	0.0411	0.0618	0.0747	0.023	0.0526	0.0911	0.0595	0.0234	0.0405	0.0505	0.0682	0.0585	0.0143	0.0323	0.0664
JTT+G+F	199	165958	164204	-81902.2	n/a	1.10037	0.0644723	0.0399808	0.051538	0.0553105	0.0128146	0.0311184	0.0584842	0.0729755	0.0214376	0.0556299	0.0906605	0.0596419	0.0233737	0.0554702	0.0634144	0.0646121	0.0537536	0.0144713	0.0438132	0.0670273
JTT+G	180	165988	164401	-82019.9	n/a	1.10076	0.0769	0.0511	0.0425	0.0513	0.0203	0.0411	0.0618	0.0747	0.023	0.0526	0.0911	0.0595	0.0234	0.0405	0.0505	0.0682	0.0585	0.0143	0.0323	0.0664
rtREV+G+I	181	166197	164601	-82118.9	0.00531066	1.21999	0.0646	0.0453	0.0376	0.0422	0.0114	0.0606	0.0607	0.0639	0.0273	0.0679	0.1018	0.0751	0.015	0.0287	0.0681	0.0488	0.0622	0.0251	0.0318	0.0619
rtREV+G	180	166236	164649	-82143.8	n/a	1.11403	0.0646	0.0453	0.0376	0.0422	0.0114	0.0606	0.0607	0.0639	0.0273	0.0679	0.1018	0.0751	0.015	0.0287	0.0681	0.0488	0.0622	0.0251	0.0318	0.0619
Dayhoff+G+I+F	200	166533	164771	-82184.5	0.00587133	1.24069	0.0644723	0.0399808	0.051538	0.0553105	0.0128146	0.0311184	0.0584842	0.0729755	0.0214376	0.0556299	0.0906605	0.0596419	0.0233737	0.0554702	0.0634144	0.0646121	0.0537536	0.0144713	0.0438132	0.0670273
Dayhoff+G+F	199	166592	164838	-82219	n/a	1.12395	0.0644723	0.0399808	0.051538	0.0553105	0.0128146	0.0311184	0.0584842	0.0729755	0.0214376	0.0556299	0.0906605	0.0596419	0.0233737	0.0554702	0.0634144	0.0646121	0.0537536	0.0144713	0.0438132	0.0670273
Dayhoff+G+I	181	167237	165642	-82639.3	0.00587691	1.26586	0.0871	0.0409	0.0404	0.0469	0.0335	0.0383	0.0495	0.0886	0.0336	0.0369	0.0854	0.0805	0.0148	0.0398	0.0507	0.0696	0.0585	0.0105	0.0299	0.0647
Dayhoff+G	180	167296	165709	-82674	n/a	1.12243	0.0871	0.0409	0.0404	0.0469	0.0335	0.0383	0.0495	0.0886	0.0336	0.0369	0.0854	0.0805	0.0148	0.0398	0.0507	0.0696	0.0585	0.0105	0.0299	0.0647
mtREV24+G+I+F	200	167465	165702	-82650.3	0.00340451	1.12555	0.0644723	0.0399808	0.051538	0.0553105	0.0128146	0.0311184	0.0584842	0.0729755	0.0214376	0.0556299	0.0906605	0.0596419	0.0233737	0.0554702	0.0634144	0.0646121	0.0537536	0.0144713	0.0438132	0.0670273
mtREV24+G+F	199	167490	165736	-82668.2	n/a	1.04354	0.0644723	0.0399808	0.051538	0.0553105	0.0128146	0.0311184	0.0584842	0.0729755	0.0214376	0.0556299	0.0906605	0.0596419	0.0233737	0.0554702	0.0634144	0.0646121	0.0537536	0.0144713	0.0438132	0.0670273
cpREV+G+F	199	168605	166851	-83225.6	n/a	1.03897	0.0644723	0.0399808	0.051538	0.0553105	0.0128146	0.0311184	0.0584842	0.0729755	0.0214376	0.0556299	0.0906605	0.0596419	0.0233737	0.0554702	0.0634144	0.0646121	0.0537536	0.0144713	0.0438132	0.0670273
cpREV+G	180	168758	167171	-83405	n/a	1.05988	0.0756	0.0621	0.041	0.0371	0.0091	0.0382	0.0495	0.0838	0.0246	0.0806	0.1011	0.0504	0.022	0.0506	0.0431	0.0622	0.0543	0.0181	0.0307	0.066
WAG+I+F	199	169168	167414	-83507.4	0.00651183	n/a	0.0644723	0.0399808	0.051538	0.0553105	0.0128146	0.0311184	0.0584842	0.0729755	0.0214376	0.0556299	0.0906605	0.0596419	0.0233737	0.0554702	0.0634144	0.0646121	0.0537536	0.0144713	0.0438132	0.0670273
WAG+I	180	169297	167710	-83674.5	0.006512	n/a	0.0866279	0.043972	0.0390894	0.0570451	0.0193078	0.0367281	0.0580589	0.0832518	0.0244313	0.048466	0.086209	0.0620286	0.0195027	0.0384319	0.0457631	0.0695179	0.0610127	0.0143859	0.0352742	0.0708956
WAG+F	198	169618	167873	-83737.8	n/a	n/a	0.0644723	0.0399808	0.051538	0.0553105	0.0128146	0.0311184	0.0584842	0.0729755	0.0214376	0.0556299	0.0906605	0.0596419	0.0233737	0.0554702	0.0634144	0.0646121	0.0537536	0.0144713	0.0438132	0.0670273
WAG	179	169761	168183	-83912.1	n/a	n/a	0.0866279	0.043972	0.0390894	0.0570451	0.0193078	0.0367281	0.0580589	0.0832518	0.0244313	0.048466	0.086209	0.0620286	0.0195027	0.0384319	0.0457631	0.0695179	0.0610127	0.0143859	0.0352742	0.0708956
LG+I	180	170073	168487	-84062.8	0.00651198	n/a	0.079066	0.055941	0.041977	0.053052	0.012937	0.040767	0.071586	0.057337	0.022355	0.062157	0.099081	0.0646	0.022951	0.042302	0.04404	0.061197	0.053287	0.012066	0.034155	0.069147
LG+I+F	199	170135	168381	-83990.8	0.00651183	n/a	0.0644723	0.0399808	0.051538	0.0553105	0.0128146	0.0311184	0.0584842	0.0729755	0.0214376	0.0556299	0.0906605	0.0596419	0.0233737	0.0554702	0.0634144	0.0646121	0.0537536	0.0144713	0.0438132	0.0670273
LG	179	170598	169020	-84330.3	n/a	n/a	0.079066	0.055941	0.041977	0.053052	0.012937	0.040767	0.071586	0.057337	0.022355	0.062157	0.099081	0.0646	0.022951	0.042302	0.04404	0.061197	0.053287	0.012066	0.034155	0.069147
rtREV+I+F	199	170648	168894	-84247.2	0.00651179	n/a	0.0644723	0.0399808	0.051538	0.0553105	0.0128146	0.0311184	0.0584842	0.0729755	0.0214376	0.0556299	0.0906605	0.0596419	0.0233737	0.0554702	0.0634144	0.0646121	0.0537536	0.0144713	0.0438132	0.0670273
LG+F	198	170655	168910	-84256.3	n/a	n/a	0.0644723	0.0399808	0.051538	0.0553105	0.0128146	0.0311184	0.0584842	0.0729755	0.0214376	0.0556299	0.0906605	0.0596419	0.0233737	0.0554702	0.0634144	0.0646121	0.0537536	0.0144713	0.0438132	0.0670273
cpREV+G+I	181	170734	169138	-84387.6	0.0065189	0.390493	0.0756	0.0621	0.041	0.0371	0.0091	0.0382	0.0495	0.0838	0.0246	0.0806	0.1011	0.0504	0.022	0.0506	0.0431	0.0622	0.0543	0.0181	0.0307	0.066
JTT+I	180	170779	169192	-84415.4	0.00651205	n/a	0.0769	0.0511	0.0425	0.0513	0.0203	0.0411	0.0618	0.0747	0.023	0.0526	0.0911	0.0595	0.0234	0.0405	0.0505	0.0682	0.0585	0.0143	0.0323	0.0664
JTT+I+F	199	170779	169025	-84312.7	0.00651187	n/a	0.0644723	0.0399808	0.051538	0.0553105	0.0128146	0.0311184	0.0584842	0.0729755	0.0214376	0.0556299	0.0906605	0.0596419	0.0233737	0.0554702	0.0634144	0.0646121	0.0537536	0.0144713	0.0438132	0.0670273
cpREV+G+I+F	200	170908	169146	-84372	0.0065189	0.365333	0.0644723	0.0399808	0.051538	0.0553105	0.0128146	0.0311184	0.0584842	0.0729755	0.0214376	0.0556299	0.0906605	0.0596419	0.0233737	0.0554702	0.0634144	0.0646121	0.0537536	0.0144713	0.0438132	0.0670273
rtREV+F	198	171144	169399	-84500.9	n/a	n/a	0.0644723	0.0399808	0.051538	0.0553105	0.0128146	0.0311184	0.0584842	0.0729755	0.0214376	0.0556299	0.0906605	0.0596419	0.0233737	0.0554702	0.0634144	0.0646121	0.0537536	0.0144713	0.0438132	0.0670273
rtREV+I	180	171170	169583	-84610.9	0.00651167	n/a	0.0646	0.0453	0.0376	0.0422	0.0114	0.0606	0.0607	0.0639	0.0273	0.0679	0.1018	0.0751	0.015	0.0287	0.0681	0.0488	0.0622	0.0251	0.0318	0.0619
JTT+F	198	171315	169570	-84586.3	n/a	n/a	0.0644723	0.0399808	0.051538	0.0553105	0.0128146	0.0311184	0.0584842	0.0729755	0.0214376	0.0556299	0.0906605	0.0596419	0.0233737	0.0554702	0.0634144	0.0646121	0.0537536	0.0144713	0.0438132	0.0670273
JTT	179	171326	169748	-84694.5	n/a	n/a	0.0769	0.0511	0.0425	0.0513	0.0203	0.0411	0.0618	0.0747	0.023	0.0526	0.0911	0.0595	0.0234	0.0405	0.0505	0.0682	0.0585	0.0143	0.0323	0.0664
Dayhoff+I+F	199	171384	169630	-84615.4	0.00651113	n/a	0.0644723	0.0399808	0.051538	0.0553105	0.0128146	0.0311184	0.0584842	0.0729755	0.0214376	0.0556299	0.0906605	0.0596419	0.0233737	0.0554702	0.0634144	0.0646121	0.0537536	0.0144713	0.0438132	0.0670273
rtREV	179	171658	170081	-84860.7	n/a	n/a	0.0646	0.0453	0.0376	0.0422	0.0114	0.0606	0.0607	0.0639	0.0273	0.0679	0.1018	0.0751	0.015	0.0287	0.0681	0.0488	0.0622	0.0251	0.0318	0.0619
Dayhoff+F	198	171924	170179	-84890.5	n/a	n/a	0.0644723	0.0399808	0.051538	0.0553105	0.0128146	0.0311184	0.0584842	0.0729755	0.0214376	0.0556299	0.0906605	0.0596419	0.0233737	0.0554702	0.0634144	0.0646121	0.0537536	0.0144713	0.0438132	0.0670273
Dayhoff+I	180	171984	170398	-85018.1	0.00651103	n/a	0.0871	0.0409	0.0404	0.0469	0.0335	0.0383	0.0495	0.0886	0.0336	0.0369	0.0854	0.0805	0.0148	0.0398	0.0507	0.0696	0.0585	0.0105	0.0299	0.0647
Dayhoff	179	172539	170961	-85300.9	n/a	n/a	0.0871	0.0409	0.0404	0.0469	0.0335	0.0383	0.0495	0.0886	0.0336	0.0369	0.0854	0.0805	0.0148	0.0398	0.0507	0.0696	0.0585	0.0105	0.0299	0.0647
mtREV24+G+I	181	172654	171058	-85347.5	0.00333368	1.06338	0.072	0.019	0.039	0.019	0.006	0.025	0.024	0.056	0.028	0.087	0.168	0.023	0.053	0.06	0.055	0.072	0.088	0.029	0.033	0.044
mtREV24+G	180	172675	171088	-85363.3	n/a	1.00669	0.072	0.019	0.039	0.019	0.006	0.025	0.024	0.056	0.028	0.087	0.168	0.023	0.053	0.06	0.055	0.072	0.088	0.029	0.033	0.044
mtREV24+I+F	199	172900	171146	-85373	0.00651171	n/a	0.0644723	0.0399808	0.051538	0.0553105	0.0128146	0.0311184	0.0584842	0.0729755	0.0214376	0.0556299	0.0906605	0.0596419	0.0233737	0.0554702	0.0634144	0.0646121	0.0537536	0.0144713	0.0438132	0.0670273
cpREV	179	172994	171416	-85528.3	n/a	n/a	0.0756	0.0621	0.041	0.0371	0.0091	0.0382	0.0495	0.0838	0.0246	0.0806	0.1011	0.0504	0.022	0.0506	0.0431	0.0622	0.0543	0.0181	0.0307	0.066
mtREV24+F	198	173315	171570	-85586.3	n/a	n/a	0.0644723	0.0399808	0.051538	0.0553105	0.0128146	0.0311184	0.0584842	0.0729755	0.0214376	0.0556299	0.0906605	0.0596419	0.0233737	0.0554702	0.0634144	0.0646121	0.0537536	0.0144713	0.0438132	0.0670273
cpREV+F	198	173481	171736	-85669.3	n/a	n/a	0.0644723	0.0399808	0.051538	0.0553105	0.0128146	0.0311184	0.0584842	0.0729755	0.0214376	0.0556299	0.0906605	0.0596419	0.0233737	0.0554702	0.0634144	0.0646121	0.0537536	0.0144713	0.0438132	0.0670273
cpREV+I+F	199	177848	176094	-87847.1	0.0065189	n/a	0.0644723	0.0399808	0.051538	0.0553105	0.0128146	0.0311184	0.0584842	0.0729755	0.0214376	0.0556299	0.0906605	0.0596419	0.0233737	0.0554702	0.0634144	0.0646121	0.0537536	0.0144713	0.0438132	0.0670273
cpREV+I	180	178116	176529	-88084.1	0.0065189	n/a	0.0756	0.0621	0.041	0.0371	0.0091	0.0382	0.0495	0.0838	0.0246	0.0806	0.1011	0.0504	0.022	0.0506	0.0431	0.0622	0.0543	0.0181	0.0307	0.066
mtREV24+I	180	179456	177869	-88754.1	0.00650981	n/a	0.072	0.019	0.039	0.019	0.006	0.025	0.024	0.056	0.028	0.087	0.168	0.023	0.053	0.06	0.055	0.072	0.088	0.029	0.033	0.044
mtREV24	179	179820	178242	-88941.4	n/a	n/a	0.072	0.019	0.039	0.019	0.006	0.025	0.024	0.056	0.028	0.087	0.168	0.023	0.053	0.06	0.055	0.072	0.088	0.029	0.033	0.044

## Sheet: Caption
Table. Maximum Likelihood fits of 56 different amino acid substitution models
NOTE.-- Models with the lowest BIC scores (Bayesian Information Criterion) are considered to describe the substitution pattern the best. For each model, AICc value (Akaike Information Criterion, corrected), Maximum Likelihood value (lnL), and the number of parameters (including branch lengths) are also presented [1]. Non-uniformity of evolutionary rates among sites may be modeled by using a discr…
Abbreviations: TR: General Time Reversible; JTT: Jones-Taylor-Thornton; rtREV: General Reverse Transcriptase; cpREV: General Reversible Chloroplast; mtREV24: General Reversible Mitochondrial./div>
1. Nei M. and Kumar S. (2000). Molecular Evolution and Phylogenetics. Oxford University Press, New York.
2. Kumar S., Stecher G., Li M., Knyaz C., and Tamura K. (2018). MEGA X: Molecular Evolutionary Genetics Analysis across computing platforms. Molecular Biology and Evolution 35:1547-1549.
Disclaimer: Although utmost care has been taken to ensure the correctness of the caption, the caption text is provided "as is" without any warranty of any kind. Authors advise the user to carefully check the caption prior to its use for any purpose and report any errors or problems to the authors immediately (www.megasoftware.net). In no event shall the authors and their employers be liable for a…

## Sheet: LG+G+I
From\To	A	R	N	D	C	Q	E	G	H	I	L	K	M	F	P	S	T	W	Y	V
A	-	0.0012077	0.000590135	0.00106464	0.00163538	0.00200807	0.00377571	0.00601616	0.00040742	0.000472971	0.00198931	0.0017602	0.00131017	0.00054504	0.00263396	0.0146919	0.00579001	0.000110741	0.000379807	0.00894738
R	0.00170694	-	0.00160289	0.00033397	0.000351211	0.00581349	0.00132324	0.00113621	0.00275498	0.000400874	0.00151888	0.0207545	0.000564302	0.000113266	0.000743751	0.0026671	0.00156688	0.000363754	0.000545428	0.000600106
N	0.00111155	0.00213611	-	0.0136767	0.000347411	0.00351088	0.00196944	0.00418632	0.00511945	0.00060452	0.000344321	0.00703754	0.00043244	0.000192332	0.000361856	0.0124578	0.00541432	2.78058e-05	0.00106162	0.000293888
D	0.00158668	0.000352157	0.0108216	-	4.11006e-05	0.00108362	0.0190645	0.00246036	0.00105258	3.37453e-05	7.58616e-05	0.000928328	2.97786e-05	3.74158e-05	0.000882249	0.00385473	0.00115248	1.83162e-05	0.000234357	0.000133329
C	0.00999481	0.00151867	0.00112725	0.000168545	-	0.000175586	1.27209e-05	0.00165766	0.000727224	0.00101213	0.00298901	4.35229e-05	0.00104167	0.00237447	0.000168601	0.00865405	0.00309453	0.000410645	0.00202173	0.00688046
Q	0.00389457	0.00797735	0.00361509	0.00141016	5.57206e-05	-	0.0150098	0.000780277	0.00546489	0.000229979	0.00293089	0.010611	0.00194953	7.70293e-05	0.00139631	0.00380361	0.00292311	0.000144739	0.000446375	0.000738625
E	0.00417023	0.00103405	0.00115485	0.0141286	2.29891e-06	0.00854783	-	0.00101582	0.000481242	0.000139732	0.000350591	0.00592896	0.000202504	4.04127e-05	0.00093806	0.00190199	0.00163604	4.77066e-05	0.000208216	0.000860488
G	0.0082961	0.00110855	0.00306484	0.00227649	0.000374019	0.000554782	0.00126826	-	0.000353635	2.74792e-05	0.000222719	0.000973199	0.000162645	0.000192463	0.000440527	0.00540782	0.000351368	0.000164527	9.48463e-05	0.000269352
H	0.00144098	0.00689404	0.00961302	0.00249793	0.00042085	0.00996588	0.00154105	0.000907018	-	0.000343709	0.00184329	0.00228757	0.000515742	0.00146548	0.00113811	0.00307692	0.00158115	0.000365866	0.00920524	0.000417939
I	0.000601636	0.000360785	0.000408256	2.88021e-05	0.000210659	0.000150837	0.000160929	2.53483e-05	0.000123616	-	0.0208577	0.000521871	0.00498129	0.00239053	0.000175085	0.000199236	0.00279755	6.84237e-05	0.000403335	0.0373966
L	0.00158746	0.000857559	0.000145876	4.06194e-05	0.000390275	0.00120592	0.000253302	0.000128885	0.000415889	0.0130848	-	0.000451108	0.00735764	0.00557003	0.000557053	0.000566541	0.000819818	0.000379702	0.00051977	0.00597955
K	0.00215437	0.0179725	0.00457299	0.000762378	8.71603e-06	0.00669628	0.00657013	0.000863782	0.000791621	0.000502136	0.000691892	-	0.000765333	5.13844e-05	0.000873003	0.00232688	0.00307663	3.05817e-05	0.000228849	0.000650376
M	0.00451352	0.00137544	0.000790925	6.88342e-05	0.000587166	0.00346289	0.000631627	0.000406324	0.000502349	0.0134906	0.0317634	0.00215418	-	0.00386458	0.000223324	0.00107834	0.0054676	0.000426606	0.000834874	0.00666775
F	0.00101873	0.000149785	0.000190854	4.69241e-05	0.000726173	7.42342e-05	6.83889e-05	0.000260868	0.000774449	0.00351256	0.0130463	7.84698e-05	0.00209673	-	0.00021128	0.00112452	0.000446533	0.00150569	0.0135367	0.00229906
P	0.00472881	0.000944736	0.000344906	0.00106279	4.95275e-05	0.00129254	0.00152479	0.000573536	0.000577711	0.000247111	0.00125326	0.00128056	0.000116383	0.000202942	-	0.00415886	0.00154653	5.82949e-05	0.000155443	0.00104123
S	0.0189818	0.00243803	0.00854522	0.00334168	0.00182946	0.00253381	0.00222488	0.00506672	0.00112398	0.000202361	0.000917258	0.00245627	0.000404414	0.000777316	0.0029929	-	0.0175156	0.000152499	0.000694789	0.000345443
T	0.00859108	0.00164492	0.00426515	0.0011474	0.00075129	0.00223631	0.00219787	0.000378073	0.000663327	0.00326322	0.00152436	0.0037298	0.00235492	0.000354481	0.00127816	0.0201156	-	8.62956e-05	0.000426436	0.00768418
W	0.000725662	0.00168645	9.67348e-05	8.05328e-05	0.000440288	0.000489026	0.000283037	0.000781826	0.00067785	0.000352479	0.00311795	0.000163731	0.000811457	0.00527877	0.000212772	0.000773453	0.000381107	-	0.00546714	0.000665504
Y	0.000879221	0.000893333	0.00130475	0.00036402	0.000765778	0.000532788	0.000436404	0.000159221	0.00602498	0.000734009	0.00150781	0.000432841	0.000561007	0.0167656	0.00020043	0.00124488	0.000665305	0.00193139	-	0.000875515
V	0.0102309	0.000485495	0.00017841	0.000102295	0.00128729	0.000435471	0.00089084	0.000223348	0.000135118	0.0336162	0.00856812	0.000607608	0.00221313	0.00140649	0.000663161	0.000305727	0.00592168	0.000116129	0.000432459	-

## Sheet: LG+G
From\To	A	R	N	D	C	Q	E	G	H	I	L	K	M	F	P	S	T	W	Y	V
A	-	0.0012077	0.000590135	0.00106464	0.00163538	0.00200807	0.00377571	0.00601616	0.00040742	0.000472971	0.00198931	0.0017602	0.00131017	0.00054504	0.00263396	0.0146919	0.00579001	0.000110741	0.000379807	0.00894738
R	0.00170694	-	0.00160289	0.00033397	0.000351211	0.00581349	0.00132324	0.00113621	0.00275498	0.000400874	0.00151888	0.0207545	0.000564302	0.000113266	0.000743751	0.0026671	0.00156688	0.000363754	0.000545428	0.000600106
N	0.00111155	0.00213611	-	0.0136767	0.000347411	0.00351088	0.00196944	0.00418632	0.00511945	0.00060452	0.000344321	0.00703754	0.00043244	0.000192332	0.000361856	0.0124578	0.00541432	2.78058e-05	0.00106162	0.000293888
D	0.00158668	0.000352157	0.0108216	-	4.11006e-05	0.00108362	0.0190645	0.00246036	0.00105258	3.37453e-05	7.58616e-05	0.000928328	2.97786e-05	3.74158e-05	0.000882249	0.00385473	0.00115248	1.83162e-05	0.000234357	0.000133329
C	0.00999481	0.00151867	0.00112725	0.000168545	-	0.000175586	1.27209e-05	0.00165766	0.000727224	0.00101213	0.00298901	4.35229e-05	0.00104167	0.00237447	0.000168601	0.00865405	0.00309453	0.000410645	0.00202173	0.00688046
Q	0.00389457	0.00797735	0.00361509	0.00141016	5.57206e-05	-	0.0150098	0.000780277	0.00546489	0.000229979	0.00293089	0.010611	0.00194953	7.70293e-05	0.00139631	0.00380361	0.00292311	0.000144739	0.000446375	0.000738625
E	0.00417023	0.00103405	0.00115485	0.0141286	2.29891e-06	0.00854783	-	0.00101582	0.000481242	0.000139732	0.000350591	0.00592896	0.000202504	4.04127e-05	0.00093806	0.00190199	0.00163604	4.77066e-05	0.000208216	0.000860488
G	0.0082961	0.00110855	0.00306484	0.00227649	0.000374019	0.000554782	0.00126826	-	0.000353635	2.74792e-05	0.000222719	0.000973199	0.000162645	0.000192463	0.000440527	0.00540782	0.000351368	0.000164527	9.48463e-05	0.000269352
H	0.00144098	0.00689404	0.00961302	0.00249793	0.00042085	0.00996588	0.00154105	0.000907018	-	0.000343709	0.00184329	0.00228757	0.000515742	0.00146548	0.00113811	0.00307692	0.00158115	0.000365866	0.00920524	0.000417939
I	0.000601636	0.000360785	0.000408256	2.88021e-05	0.000210659	0.000150837	0.000160929	2.53483e-05	0.000123616	-	0.0208577	0.000521871	0.00498129	0.00239053	0.000175085	0.000199236	0.00279755	6.84237e-05	0.000403335	0.0373966
L	0.00158746	0.000857559	0.000145876	4.06194e-05	0.000390275	0.00120592	0.000253302	0.000128885	0.000415889	0.0130848	-	0.000451108	0.00735764	0.00557003	0.000557053	0.000566541	0.000819818	0.000379702	0.00051977	0.00597955
K	0.00215437	0.0179725	0.00457299	0.000762378	8.71603e-06	0.00669628	0.00657013	0.000863782	0.000791621	0.000502136	0.000691892	-	0.000765333	5.13844e-05	0.000873003	0.00232688	0.00307663	3.05817e-05	0.000228849	0.000650376
M	0.00451352	0.00137544	0.000790925	6.88342e-05	0.000587166	0.00346289	0.000631627	0.000406324	0.000502349	0.0134906	0.0317634	0.00215418	-	0.00386458	0.000223324	0.00107834	0.0054676	0.000426606	0.000834874	0.00666775
F	0.00101873	0.000149785	0.000190854	4.69241e-05	0.000726173	7.42342e-05	6.83889e-05	0.000260868	0.000774449	0.00351256	0.0130463	7.84698e-05	0.00209673	-	0.00021128	0.00112452	0.000446533	0.00150569	0.0135367	0.00229906
P	0.00472881	0.000944736	0.000344906	0.00106279	4.95275e-05	0.00129254	0.00152479	0.000573536	0.000577711	0.000247111	0.00125326	0.00128056	0.000116383	0.000202942	-	0.00415886	0.00154653	5.82949e-05	0.000155443	0.00104123
S	0.0189818	0.00243803	0.00854522	0.00334168	0.00182946	0.00253381	0.00222488	0.00506672	0.00112398	0.000202361	0.000917258	0.00245627	0.000404414	0.000777316	0.0029929	-	0.0175156	0.000152499	0.000694789	0.000345443
T	0.00859108	0.00164492	0.00426515	0.0011474	0.00075129	0.00223631	0.00219787	0.000378073	0.000663327	0.00326322	0.00152436	0.0037298	0.00235492	0.000354481	0.00127816	0.0201156	-	8.62956e-05	0.000426436	0.00768418
W	0.000725662	0.00168645	9.67348e-05	8.05328e-05	0.000440288	0.000489026	0.000283037	0.000781826	0.00067785	0.000352479	0.00311795	0.000163731	0.000811457	0.00527877	0.000212772	0.000773453	0.000381107	-	0.00546714	0.000665504
Y	0.000879221	0.000893333	0.00130475	0.00036402	0.000765778	0.000532788	0.000436404	0.000159221	0.00602498	0.000734009	0.00150781	0.000432841	0.000561007	0.0167656	0.00020043	0.00124488	0.000665305	0.00193139	-	0.000875515
V	0.0102309	0.000485495	0.00017841	0.000102295	0.00128729	0.000435471	0.00089084	0.000223348	0.000135118	0.0336162	0.00856812	0.000607608	0.00221313	0.00140649	0.000663161	0.000305727	0.00592168	0.000116129	0.000432459	-

## Sheet: LG+G+I+F
From\To	A	R	N	D	C	Q	E	G	H	I	L	K	M	F	P	S	T	W	Y	V
A	-	0.000879594	0.00073836	0.00113112	0.00165079	0.00156202	0.00314348	0.00780302	0.000398148	0.000431373	0.00185495	0.00165608	0.00135974	0.00072833	0.00386502	0.0158075	0.00595205	0.000135349	0.000496495	0.00883844
R	0.00141842	-	0.00200549	0.000354825	0.000354521	0.00452217	0.00110167	0.00147368	0.00269228	0.000365618	0.00141629	0.0195268	0.000585651	0.000151355	0.00109136	0.00286962	0.00161073	0.000444585	0.000713001	0.000592799
N	0.000923665	0.00155577	-	0.0145308	0.000350685	0.00273103	0.00163966	0.00542969	0.00500294	0.000551353	0.000321064	0.00662127	0.0004488	0.00025701	0.00053098	0.0134038	0.00556585	3.39846e-05	0.00138778	0.00029031
D	0.00131849	0.000256483	0.0135397	-	4.14879e-05	0.000842919	0.0158722	0.00319111	0.00102862	3.07774e-05	7.07377e-05	0.000873417	3.09052e-05	4.99982e-05	0.00129459	0.00414742	0.00118473	2.23863e-05	0.000306359	0.000131706
C	0.00830538	0.00110608	0.00141039	0.00017907	-	0.000136584	1.05908e-05	0.00215	0.000710674	0.000923112	0.00278712	4.09485e-05	0.00108108	0.00317298	0.000247402	0.00931117	0.00318114	0.000501896	0.00264287	0.00679669
Q	0.00323627	0.00581007	0.0045231	0.00149822	5.62457e-05	-	0.0124965	0.00101203	0.00534052	0.000209753	0.00273293	0.00998338	0.00202329	0.000102933	0.00204891	0.00409242	0.00300492	0.000176902	0.000583516	0.000729632
E	0.00346534	0.00075312	0.00144491	0.0150109	2.32058e-06	0.00664914	-	0.00131752	0.00047029	0.000127443	0.000326911	0.00557826	0.000210166	5.4003e-05	0.00137649	0.00204641	0.00168183	5.83076e-05	0.000272187	0.000850011
G	0.0068938	0.000807378	0.00383465	0.00241865	0.000377544	0.000431551	0.00105589	-	0.000345587	2.50624e-05	0.000207676	0.000915634	0.000168798	0.000257185	0.00064642	0.00581845	0.000361201	0.000201088	0.000123986	0.000266072
H	0.00119741	0.00502108	0.0120275	0.00265392	0.000424816	0.0077522	0.00128301	0.00117641	-	0.000313481	0.00171879	0.00215226	0.000535254	0.0019583	0.00167003	0.00331055	0.0016254	0.000447166	0.0120334	0.00041285
I	0.000499941	0.000262767	0.000510798	3.06007e-05	0.000212644	0.000117332	0.000133982	3.2877e-05	0.000120803	-	0.019449	0.000491003	0.00516974	0.00319444	0.000256916	0.000214364	0.00287584	8.36283e-05	0.000527252	0.0369412
L	0.00131913	0.000624578	0.000182516	4.31559e-05	0.000393953	0.000938053	0.000210887	0.000167165	0.000406424	0.011934	-	0.000424425	0.007636	0.00744315	0.000817408	0.000609559	0.000842762	0.000464076	0.000679459	0.00590674
K	0.00179021	0.0130898	0.00572159	0.000809986	8.79817e-06	0.00520887	0.00546998	0.00112033	0.000773605	0.000457973	0.00064516	-	0.000794288	6.86643e-05	0.00128103	0.00250356	0.00316273	3.73773e-05	0.000299159	0.000642457
M	0.00375059	0.00100176	0.000989583	7.31326e-05	0.0005927	0.00269369	0.000525863	0.000527007	0.000490917	0.0123041	0.029618	0.00202676	-	0.00516418	0.000327702	0.00116022	0.00562062	0.000521404	0.00109137	0.00658656
F	0.00084653	0.000109091	0.000238791	4.98543e-05	0.000733016	5.77449e-05	5.69373e-05	0.000338348	0.000756824	0.00320364	0.0121651	7.38283e-05	0.00217606	-	0.000310028	0.00120991	0.000459029	0.00184027	0.0176955	0.00227106
P	0.00392949	0.000688071	0.000431536	0.00112915	4.99943e-05	0.00100543	0.00126947	0.000743882	0.000564563	0.000225378	0.00116861	0.00120482	0.000120786	0.000271189	-	0.00447465	0.00158981	7.12488e-05	0.0002032	0.00102855
S	0.0157733	0.00177567	0.0106915	0.00355036	0.0018467	0.00197099	0.00185233	0.00657159	0.0010984	0.000184564	0.000855304	0.00231098	0.000419714	0.00103872	0.00439171	-	0.0180057	0.000186386	0.00090825	0.000341237
T	0.00713892	0.00119803	0.00533643	0.00121905	0.00075837	0.00173957	0.00182984	0.000490364	0.000648231	0.00297622	0.0014214	0.00350919	0.00244402	0.000473688	0.00187554	0.021643	-	0.000105472	0.000557451	0.00759061
W	0.000603002	0.00122828	0.000121032	8.55618e-05	0.000444437	0.000380401	0.000235643	0.00101404	0.000662423	0.000321479	0.00290736	0.000154046	0.000842157	0.00705395	0.000312217	0.000832183	0.000391772	-	0.00714682	0.000657401
Y	0.000730605	0.000650633	0.00163246	0.000386751	0.000772995	0.000414442	0.000363329	0.000206512	0.00588786	0.000669454	0.00140597	0.000407238	0.000582232	0.0224036	0.000294107	0.00133941	0.000683925	0.00236057	-	0.000864855
V	0.00850153	0.000353596	0.000223222	0.000108683	0.00129943	0.000338742	0.000741671	0.000289684	0.000132043	0.0306597	0.0079894	0.000571668	0.00229686	0.00187948	0.000973108	0.000328941	0.00608741	0.000141934	0.000565323	-

## Sheet: LG+G+F
From\To	A	R	N	D	C	Q	E	G	H	I	L	K	M	F	P	S	T	W	Y	V
A	-	0.000879594	0.00073836	0.00113112	0.00165079	0.00156202	0.00314348	0.00780302	0.000398148	0.000431373	0.00185495	0.00165608	0.00135974	0.00072833	0.00386502	0.0158075	0.00595205	0.000135349	0.000496495	0.00883844
R	0.00141842	-	0.00200549	0.000354825	0.000354521	0.00452217	0.00110167	0.00147368	0.00269228	0.000365618	0.00141629	0.0195268	0.000585651	0.000151355	0.00109136	0.00286962	0.00161073	0.000444585	0.000713001	0.000592799
N	0.000923665	0.00155577	-	0.0145308	0.000350685	0.00273103	0.00163966	0.00542969	0.00500294	0.000551353	0.000321064	0.00662127	0.0004488	0.00025701	0.00053098	0.0134038	0.00556585	3.39846e-05	0.00138778	0.00029031
D	0.00131849	0.000256483	0.0135397	-	4.14879e-05	0.000842919	0.0158722	0.00319111	0.00102862	3.07774e-05	7.07377e-05	0.000873417	3.09052e-05	4.99982e-05	0.00129459	0.00414742	0.00118473	2.23863e-05	0.000306359	0.000131706
C	0.00830538	0.00110608	0.00141039	0.00017907	-	0.000136584	1.05908e-05	0.00215	0.000710674	0.000923112	0.00278712	4.09485e-05	0.00108108	0.00317298	0.000247402	0.00931117	0.00318114	0.000501896	0.00264287	0.00679669
Q	0.00323627	0.00581007	0.0045231	0.00149822	5.62457e-05	-	0.0124965	0.00101203	0.00534052	0.000209753	0.00273293	0.00998338	0.00202329	0.000102933	0.00204891	0.00409242	0.00300492	0.000176902	0.000583516	0.000729632
E	0.00346534	0.00075312	0.00144491	0.0150109	2.32058e-06	0.00664914	-	0.00131752	0.00047029	0.000127443	0.000326911	0.00557826	0.000210166	5.4003e-05	0.00137649	0.00204641	0.00168183	5.83076e-05	0.000272187	0.000850011
G	0.0068938	0.000807378	0.00383465	0.00241865	0.000377544	0.000431551	0.00105589	-	0.000345587	2.50624e-05	0.000207676	0.000915634	0.000168798	0.000257185	0.00064642	0.00581845	0.000361201	0.000201088	0.000123986	0.000266072
H	0.00119741	0.00502108	0.0120275	0.00265392	0.000424816	0.0077522	0.00128301	0.00117641	-	0.000313481	0.00171879	0.00215226	0.000535254	0.0019583	0.00167003	0.00331055	0.0016254	0.000447166	0.0120334	0.00041285
I	0.000499941	0.000262767	0.000510798	3.06007e-05	0.000212644	0.000117332	0.000133982	3.2877e-05	0.000120803	-	0.019449	0.000491003	0.00516974	0.00319444	0.000256916	0.000214364	0.00287584	8.36283e-05	0.000527252	0.0369412
L	0.00131913	0.000624578	0.000182516	4.31559e-05	0.000393953	0.000938053	0.000210887	0.000167165	0.000406424	0.011934	-	0.000424425	0.007636	0.00744315	0.000817408	0.000609559	0.000842762	0.000464076	0.000679459	0.00590674
K	0.00179021	0.0130898	0.00572159	0.000809986	8.79817e-06	0.00520887	0.00546998	0.00112033	0.000773605	0.000457973	0.00064516	-	0.000794288	6.86643e-05	0.00128103	0.00250356	0.00316273	3.73773e-05	0.000299159	0.000642457
M	0.00375059	0.00100176	0.000989583	7.31326e-05	0.0005927	0.00269369	0.000525863	0.000527007	0.000490917	0.0123041	0.029618	0.00202676	-	0.00516418	0.000327702	0.00116022	0.00562062	0.000521404	0.00109137	0.00658656
F	0.00084653	0.000109091	0.000238791	4.98543e-05	0.000733016	5.77449e-05	5.69373e-05	0.000338348	0.000756824	0.00320364	0.0121651	7.38283e-05	0.00217606	-	0.000310028	0.00120991	0.000459029	0.00184027	0.0176955	0.00227106
P	0.00392949	0.000688071	0.000431536	0.00112915	4.99943e-05	0.00100543	0.00126947	0.000743882	0.000564563	0.000225378	0.00116861	0.00120482	0.000120786	0.000271189	-	0.00447465	0.00158981	7.12488e-05	0.0002032	0.00102855
S	0.0157733	0.00177567	0.0106915	0.00355036	0.0018467	0.00197099	0.00185233	0.00657159	0.0010984	0.000184564	0.000855304	0.00231098	0.000419714	0.00103872	0.00439171	-	0.0180057	0.000186386	0.00090825	0.000341237
T	0.00713892	0.00119803	0.00533643	0.00121905	0.00075837	0.00173957	0.00182984	0.000490364	0.000648231	0.00297622	0.0014214	0.00350919	0.00244402	0.000473688	0.00187554	0.021643	-	0.000105472	0.000557451	0.00759061
W	0.000603002	0.00122828	0.000121032	8.55618e-05	0.000444437	0.000380401	0.000235643	0.00101404	0.000662423	0.000321479	0.00290736	0.000154046	0.000842157	0.00705395	0.000312217	0.000832183	0.000391772	-	0.00714682	0.000657401
Y	0.000730605	0.000650633	0.00163246	0.000386751	0.000772995	0.000414442	0.000363329	0.000206512	0.00588786	0.000669454	0.00140597	0.000407238	0.000582232	0.0224036	0.000294107	0.00133941	0.000683925	0.00236057	-	0.000864855
V	0.00850153	0.000353596	0.000223222	0.000108683	0.00129943	0.000338742	0.000741671	0.000289684	0.000132043	0.0306597	0.0079894	0.000571668	0.00229686	0.00187948	0.000973108	0.000328941	0.00608741	0.000141934	0.000565323	-

## Sheet: WAG+G+I+F
From\To	A	R	N	D	C	Q	E	G	H	I	L	K	M	F	P	S	T	W	Y	V
A	-	0.00117831	0.00140403	0.00218403	0.000703235	0.00151076	0.00494636	0.00552419	0.00036306	0.000574679	0.00192759	0.00288811	0.00111591	0.000623888	0.00487439	0.0116373	0.00609225	8.74793e-05	0.000563575	0.00718442
R	0.00190012	-	0.00174962	0.000435341	0.000361663	0.00504725	0.00137235	0.00227977	0.00244803	0.000555786	0.00241084	0.0170541	0.000853215	0.000304427	0.00230238	0.00422639	0.00159238	0.000899993	0.000893192	0.000901984
N	0.00175639	0.00135728	-	0.016046	0.000181626	0.00256667	0.00295996	0.00438887	0.0045318	0.00164744	0.000637153	0.00959876	0.000247562	0.000285017	0.000661013	0.0137206	0.00583074	5.56091e-05	0.00254239	0.000702845
D	0.0025458	0.000314683	0.0149516	-	2.07435e-05	0.00102555	0.0192941	0.00337515	0.00106606	0.000117225	0.000410814	0.00152922	0.000129581	0.000138505	0.00143663	0.00370014	0.00107669	0.000100341	0.000762509	0.00054558
C	0.00353808	0.00112837	0.000730465	8.95332e-05	-	0.000164308	6.67243e-05	0.00119581	0.000285189	0.000505718	0.00186158	0.000235933	0.000487681	0.0011797	0.000370705	0.0048598	0.00147339	0.000554469	0.00127315	0.00358911
Q	0.00313006	0.00648469	0.00425089	0.00182283	6.76626e-05	-	0.0170919	0.00128696	0.00491876	0.000338613	0.00421201	0.0124124	0.00192991	0.000296157	0.00316264	0.00355207	0.00246414	0.000166817	0.000533083	0.00107902
E	0.00545281	0.000938164	0.00260841	0.018247	1.46201e-05	0.0090943	-	0.00221369	0.000652944	0.000378676	0.000747286	0.00823613	0.000393565	0.000240474	0.00231209	0.00243373	0.00236314	0.000121057	0.000459557	0.00210851
G	0.0048805	0.00124901	0.00309958	0.00255814	0.000209986	0.00054879	0.0017741	-	0.000285691	9.05115e-05	0.00029697	0.00119047	0.000217437	0.000147992	0.000825314	0.0046325	0.000648637	0.00026057	0.000242543	0.000670616
H	0.00109188	0.00456556	0.0108949	0.00275051	0.000170476	0.00713999	0.00178131	0.000972519	-	0.000410763	0.00241951	0.00283765	0.00050474	0.0020136	0.002359	0.00255536	0.00135943	0.00020303	0.00906796	0.000423893
I	0.000666026	0.00039944	0.00152626	0.000116552	0.000116495	0.000189414	0.000398105	0.000118733	0.000158292	-	0.0153609	0.001032	0.00531723	0.00314019	0.000338599	0.00110283	0.00418812	0.000164301	0.000983643	0.0280116
L	0.00137079	0.00106317	0.000362203	0.000250631	0.000263129	0.00144573	0.000482067	0.00023904	0.000572117	0.00942556	-	0.000820784	0.00606229	0.0062692	0.00140905	0.00119018	0.000938123	0.000514446	0.000933189	0.00644783
K	0.00312202	0.0114322	0.00829451	0.00141816	5.06925e-05	0.0064762	0.00807626	0.00145661	0.00101996	0.000962576	0.00124766	-	0.00116684	0.000263303	0.00188699	0.00333892	0.00398368	0.000106325	0.000311979	0.0010939
M	0.00307803	0.00145943	0.000545863	0.000306633	0.000267371	0.00256936	0.000984753	0.000678864	0.00046293	0.0126551	0.023514	0.00297738	-	0.00352893	0.000580532	0.00170516	0.0043546	0.000398766	0.001003	0.00737223
F	0.000725137	0.00021942	0.000264812	0.000138106	0.000272532	0.000166142	0.000253541	0.000194695	0.000778197	0.00314923	0.0102464	0.000283105	0.001487	-	0.000547038	0.00188477	0.00049374	0.00118278	0.0151099	0.00232756
P	0.00495571	0.00145158	0.000537216	0.00125304	7.49111e-05	0.00155195	0.00213234	0.000949747	0.000797471	0.000297034	0.00201445	0.00177473	0.000213976	0.000478507	-	0.00556968	0.0022845	0.000107794	0.000505777	0.00112775
S	0.0116121	0.00261522	0.0109443	0.00316747	0.000963853	0.00171074	0.00220291	0.00523213	0.000847839	0.00094952	0.00167	0.00308208	0.000616848	0.0016181	0.00546645	-	0.0125745	0.00040498	0.0018424	0.000833543
T	0.00730708	0.00118438	0.0055904	0.00110787	0.00035125	0.00142651	0.00257112	0.000880586	0.000542157	0.00433431	0.00158223	0.00442007	0.00189351	0.000509507	0.00269508	0.0151147	-	8.57248e-05	0.000681595	0.00497187
W	0.000389735	0.00248646	0.000198045	0.000383512	0.000490992	0.000358714	0.000489236	0.00131399	0.000300764	0.000631596	0.00322291	0.000438205	0.000644076	0.00453373	0.000472361	0.00180817	0.000318423	-	0.00581845	0.00130855
Y	0.000829316	0.000815063	0.00299064	0.000962603	0.000372373	0.000378622	0.000613441	0.000403981	0.0044369	0.00124894	0.001931	0.000424689	0.000535084	0.01913	0.000732051	0.00271701	0.000836235	0.00192181	-	0.00112719
V	0.00691057	0.000538021	0.000540425	0.000450209	0.000686185	0.000500952	0.00183977	0.000730128	0.000135575	0.0232484	0.00872127	0.000973366	0.00257084	0.00192623	0.00106696	0.000803508	0.00398727	0.000282519	0.000736802	-

## Sheet: WAG+G+F
From\To	A	R	N	D	C	Q	E	G	H	I	L	K	M	F	P	S	T	W	Y	V
A	-	0.00117831	0.00140403	0.00218403	0.000703235	0.00151076	0.00494636	0.00552419	0.00036306	0.000574679	0.00192759	0.00288811	0.00111591	0.000623888	0.00487439	0.0116373	0.00609225	8.74793e-05	0.000563575	0.00718442
R	0.00190012	-	0.00174962	0.000435341	0.000361663	0.00504725	0.00137235	0.00227977	0.00244803	0.000555786	0.00241084	0.0170541	0.000853215	0.000304427	0.00230238	0.00422639	0.00159238	0.000899993	0.000893192	0.000901984
N	0.00175639	0.00135728	-	0.016046	0.000181626	0.00256667	0.00295996	0.00438887	0.0045318	0.00164744	0.000637153	0.00959876	0.000247562	0.000285017	0.000661013	0.0137206	0.00583074	5.56091e-05	0.00254239	0.000702845
D	0.0025458	0.000314683	0.0149516	-	2.07435e-05	0.00102555	0.0192941	0.00337515	0.00106606	0.000117225	0.000410814	0.00152922	0.000129581	0.000138505	0.00143663	0.00370014	0.00107669	0.000100341	0.000762509	0.00054558
C	0.00353808	0.00112837	0.000730465	8.95332e-05	-	0.000164308	6.67243e-05	0.00119581	0.000285189	0.000505718	0.00186158	0.000235933	0.000487681	0.0011797	0.000370705	0.0048598	0.00147339	0.000554469	0.00127315	0.00358911
Q	0.00313006	0.00648469	0.00425089	0.00182283	6.76626e-05	-	0.0170919	0.00128696	0.00491876	0.000338613	0.00421201	0.0124124	0.00192991	0.000296157	0.00316264	0.00355207	0.00246414	0.000166817	0.000533083	0.00107902
E	0.00545281	0.000938164	0.00260841	0.018247	1.46201e-05	0.0090943	-	0.00221369	0.000652944	0.000378676	0.000747286	0.00823613	0.000393565	0.000240474	0.00231209	0.00243373	0.00236314	0.000121057	0.000459557	0.00210851
G	0.0048805	0.00124901	0.00309958	0.00255814	0.000209986	0.00054879	0.0017741	-	0.000285691	9.05115e-05	0.00029697	0.00119047	0.000217437	0.000147992	0.000825314	0.0046325	0.000648637	0.00026057	0.000242543	0.000670616
H	0.00109188	0.00456556	0.0108949	0.00275051	0.000170476	0.00713999	0.00178131	0.000972519	-	0.000410763	0.00241951	0.00283765	0.00050474	0.0020136	0.002359	0.00255536	0.00135943	0.00020303	0.00906796	0.000423893
I	0.000666026	0.00039944	0.00152626	0.000116552	0.000116495	0.000189414	0.000398105	0.000118733	0.000158292	-	0.0153609	0.001032	0.00531723	0.00314019	0.000338599	0.00110283	0.00418812	0.000164301	0.000983643	0.0280116
L	0.00137079	0.00106317	0.000362203	0.000250631	0.000263129	0.00144573	0.000482067	0.00023904	0.000572117	0.00942556	-	0.000820784	0.00606229	0.0062692	0.00140905	0.00119018	0.000938123	0.000514446	0.000933189	0.00644783
K	0.00312202	0.0114322	0.00829451	0.00141816	5.06925e-05	0.0064762	0.00807626	0.00145661	0.00101996	0.000962576	0.00124766	-	0.00116684	0.000263303	0.00188699	0.00333892	0.00398368	0.000106325	0.000311979	0.0010939
M	0.00307803	0.00145943	0.000545863	0.000306633	0.000267371	0.00256936	0.000984753	0.000678864	0.00046293	0.0126551	0.023514	0.00297738	-	0.00352893	0.000580532	0.00170516	0.0043546	0.000398766	0.001003	0.00737223
F	0.000725137	0.00021942	0.000264812	0.000138106	0.000272532	0.000166142	0.000253541	0.000194695	0.000778197	0.00314923	0.0102464	0.000283105	0.001487	-	0.000547038	0.00188477	0.00049374	0.00118278	0.0151099	0.00232756
P	0.00495571	0.00145158	0.000537216	0.00125304	7.49111e-05	0.00155195	0.00213234	0.000949747	0.000797471	0.000297034	0.00201445	0.00177473	0.000213976	0.000478507	-	0.00556968	0.0022845	0.000107794	0.000505777	0.00112775
S	0.0116121	0.00261522	0.0109443	0.00316747	0.000963853	0.00171074	0.00220291	0.00523213	0.000847839	0.00094952	0.00167	0.00308208	0.000616848	0.0016181	0.00546645	-	0.0125745	0.00040498	0.0018424	0.000833543
T	0.00730708	0.00118438	0.0055904	0.00110787	0.00035125	0.00142651	0.00257112	0.000880586	0.000542157	0.00433431	0.00158223	0.00442007	0.00189351	0.000509507	0.00269508	0.0151147	-	8.57248e-05	0.000681595	0.00497187
W	0.000389735	0.00248646	0.000198045	0.000383512	0.000490992	0.000358714	0.000489236	0.00131399	0.000300764	0.000631596	0.00322291	0.000438205	0.000644076	0.00453373	0.000472361	0.00180817	0.000318423	-	0.00581845	0.00130855
Y	0.000829316	0.000815063	0.00299064	0.000962603	0.000372373	0.000378622	0.000613441	0.000403981	0.0044369	0.00124894	0.001931	0.000424689	0.000535084	0.01913	0.000732051	0.00271701	0.000836235	0.00192181	-	0.00112719
V	0.00691057	0.000538021	0.000540425	0.000450209	0.000686185	0.000500952	0.00183977	0.000730128	0.000135575	0.0232484	0.00872127	0.000973366	0.00257084	0.00192623	0.00106696	0.000803508	0.00398727	0.000282519	0.000736802	-

## Sheet: WAG+G+I
From\To	A	R	N	D	C	Q	E	G	H	I	L	K	M	F	P	S	T	W	Y	V
A	-	0.00129353	0.00106292	0.00224834	0.0010576	0.0017798	0.00490127	0.00629039	0.000412993	0.000499744	0.00182954	0.00299811	0.000929367	0.000431451	0.00351108	0.0124977	0.00690214	8.68013e-05	0.000452894	0.00758495
R	0.00254835	-	0.00132455	0.00044816	0.000543906	0.00594605	0.00135984	0.00259598	0.00278472	0.000483315	0.00228821	0.0177036	0.000710589	0.000210528	0.00165843	0.00453885	0.00180407	0.000893018	0.000717777	0.000952269
N	0.00235558	0.00149	-	0.0165185	0.000273148	0.00302374	0.00293298	0.00499761	0.00515507	0.00143262	0.000604743	0.00996434	0.000206179	0.000197104	0.000476135	0.014735	0.00660586	5.51781e-05	0.00204309	0.000742028
D	0.0034143	0.000345454	0.0113191	-	3.11962e-05	0.00120818	0.0191182	0.00384329	0.00121268	0.000101939	0.000389917	0.00158746	0.000107919	9.57837e-05	0.00103482	0.00397369	0.00121982	9.95638e-05	0.000612759	0.000575995
C	0.0047451	0.0012387	0.000552999	9.21696e-05	-	0.000193568	6.61161e-05	0.00136167	0.000324412	0.000439775	0.00176689	0.000244919	0.000406159	0.000815825	0.000267023	0.00521909	0.00166926	0.000550172	0.00102311	0.0037892
Q	0.00419788	0.0071188	0.00321814	0.00187651	0.000101758	-	0.0169361	0.00146547	0.00559525	0.00029446	0.00399776	0.0128851	0.0016073	0.000204808	0.00227809	0.00381467	0.00279172	0.000165524	0.00042839	0.00113918
E	0.00731303	0.0010299	0.00197469	0.0187844	2.19873e-05	0.0107138	-	0.00252073	0.000742746	0.000329298	0.000709275	0.00854982	0.000327775	0.000166301	0.00166543	0.00261365	0.00267729	0.000120118	0.000369304	0.00222606
G	0.00654549	0.00137114	0.00234654	0.00263347	0.000315798	0.000646518	0.00175793	-	0.000324983	7.87093e-05	0.000281864	0.00123581	0.00018109	0.000102344	0.000594483	0.00497498	0.000734865	0.00025855	0.00019491	0.000708002
H	0.00146438	0.005012	0.00824797	0.0028315	0.00025638	0.00841147	0.00176507	0.00110741	-	0.000357202	0.00229644	0.00294573	0.000420366	0.00139251	0.00169921	0.00274427	0.00154015	0.000201456	0.00728709	0.000447525
I	0.00089324	0.0004385	0.00115546	0.000119984	0.000175197	0.000223145	0.000394477	0.000135202	0.000180062	-	0.0145796	0.0010713	0.00442839	0.0021716	0.000243897	0.00118437	0.00474488	0.000163028	0.000790464	0.0295732
L	0.00183843	0.00116713	0.000274206	0.000258011	0.000395721	0.00170319	0.000477673	0.000272195	0.000650802	0.00819652	-	0.000852044	0.0050489	0.00433548	0.00101495	0.00127817	0.00106283	0.000510459	0.000749919	0.00680728
K	0.0041871	0.01255	0.00627936	0.00145992	7.62366e-05	0.00762948	0.00800265	0.00165864	0.00116024	0.000837061	0.00118419	-	0.000971785	0.000182088	0.00135922	0.00358576	0.00451326	0.000105501	0.000250709	0.00115488
M	0.0041281	0.00160214	0.000413246	0.000315663	0.0004021	0.00302691	0.000975776	0.000773023	0.000526598	0.0110049	0.0223179	0.00309077	-	0.00244044	0.000418164	0.00183122	0.00493349	0.000395676	0.000806017	0.00778323
F	0.000972518	0.000240876	0.000200476	0.000142173	0.000409862	0.000195729	0.00025123	0.000221699	0.000885225	0.00273858	0.00972519	0.000293887	0.00123843	-	0.000394037	0.00202411	0.000559376	0.00117362	0.0121424	0.00245731
P	0.00664634	0.00159352	0.0004067	0.00128994	0.000112659	0.00182832	0.0021129	0.00108148	0.000907151	0.000258302	0.00191198	0.00184232	0.000178207	0.000330913	-	0.00598145	0.0025882	0.000106959	0.000406447	0.00119062
S	0.0155736	0.00287095	0.00828537	0.00326074	0.00144954	0.00201539	0.00218283	0.00595783	0.000964445	0.000825708	0.00158505	0.00319946	0.000513734	0.001119	0.00393754	-	0.0142462	0.000401841	0.00148057	0.000880012
T	0.00979989	0.0013002	0.00423222	0.0011405	0.000528247	0.00168054	0.00254768	0.00100272	0.000616722	0.00376914	0.00150175	0.00458841	0.00157699	0.000352351	0.0019413	0.0162321	-	8.50604e-05	0.000547736	0.00524905
W	0.000522694	0.0027296	0.00014993	0.000394805	0.000738405	0.000422594	0.000484776	0.00149624	0.000342129	0.000549239	0.00305898	0.000454894	0.00053641	0.00313531	0.000340247	0.00194184	0.000360754	-	0.00467576	0.0013815
Y	0.00111224	0.000894764	0.00226407	0.000990948	0.000560013	0.000446047	0.000607849	0.000460013	0.00504712	0.00108608	0.00183278	0.000440864	0.000445638	0.0132294	0.000527305	0.00291788	0.000947402	0.00190692	-	0.00119003
V	0.00926811	0.000590631	0.000409129	0.000463466	0.00103196	0.000590161	0.001823	0.000831397	0.000154221	0.020217	0.00827765	0.00101044	0.00214109	0.00133209	0.000768547	0.000862911	0.00451733	0.000280329	0.0005921	-

## Sheet: WAG+G
From\To	A	R	N	D	C	Q	E	G	H	I	L	K	M	F	P	S	T	W	Y	V
A	-	0.00129353	0.00106292	0.00224834	0.0010576	0.0017798	0.00490127	0.00629039	0.000412993	0.000499744	0.00182954	0.00299811	0.000929367	0.000431451	0.00351108	0.0124977	0.00690214	8.68013e-05	0.000452894	0.00758495
R	0.00254835	-	0.00132455	0.00044816	0.000543906	0.00594605	0.00135984	0.00259598	0.00278472	0.000483315	0.00228821	0.0177036	0.000710589	0.000210528	0.00165843	0.00453885	0.00180407	0.000893018	0.000717777	0.000952269
N	0.00235558	0.00149	-	0.0165185	0.000273148	0.00302374	0.00293298	0.00499761	0.00515507	0.00143262	0.000604743	0.00996434	0.000206179	0.000197104	0.000476135	0.014735	0.00660586	5.51781e-05	0.00204309	0.000742028
D	0.0034143	0.000345454	0.0113191	-	3.11962e-05	0.00120818	0.0191182	0.00384329	0.00121268	0.000101939	0.000389917	0.00158746	0.000107919	9.57837e-05	0.00103482	0.00397369	0.00121982	9.95638e-05	0.000612759	0.000575995
C	0.0047451	0.0012387	0.000552999	9.21696e-05	-	0.000193568	6.61161e-05	0.00136167	0.000324412	0.000439775	0.00176689	0.000244919	0.000406159	0.000815825	0.000267023	0.00521909	0.00166926	0.000550172	0.00102311	0.0037892
Q	0.00419788	0.0071188	0.00321814	0.00187651	0.000101758	-	0.0169361	0.00146547	0.00559525	0.00029446	0.00399776	0.0128851	0.0016073	0.000204808	0.00227809	0.00381467	0.00279172	0.000165524	0.00042839	0.00113918
E	0.00731303	0.0010299	0.00197469	0.0187844	2.19873e-05	0.0107138	-	0.00252073	0.000742746	0.000329298	0.000709275	0.00854982	0.000327775	0.000166301	0.00166543	0.00261365	0.00267729	0.000120118	0.000369304	0.00222606
G	0.00654549	0.00137114	0.00234654	0.00263347	0.000315798	0.000646518	0.00175793	-	0.000324983	7.87093e-05	0.000281864	0.00123581	0.00018109	0.000102344	0.000594483	0.00497498	0.000734865	0.00025855	0.00019491	0.000708002
H	0.00146438	0.005012	0.00824797	0.0028315	0.00025638	0.00841147	0.00176507	0.00110741	-	0.000357202	0.00229644	0.00294573	0.000420366	0.00139251	0.00169921	0.00274427	0.00154015	0.000201456	0.00728709	0.000447525
I	0.00089324	0.0004385	0.00115546	0.000119984	0.000175197	0.000223145	0.000394477	0.000135202	0.000180062	-	0.0145796	0.0010713	0.00442839	0.0021716	0.000243897	0.00118437	0.00474488	0.000163028	0.000790464	0.0295732
L	0.00183843	0.00116713	0.000274206	0.000258011	0.000395721	0.00170319	0.000477673	0.000272195	0.000650802	0.00819652	-	0.000852044	0.0050489	0.00433548	0.00101495	0.00127817	0.00106283	0.000510459	0.000749919	0.00680728
K	0.0041871	0.01255	0.00627936	0.00145992	7.62366e-05	0.00762948	0.00800265	0.00165864	0.00116024	0.000837061	0.00118419	-	0.000971785	0.000182088	0.00135922	0.00358576	0.00451326	0.000105501	0.000250709	0.00115488
M	0.0041281	0.00160214	0.000413246	0.000315663	0.0004021	0.00302691	0.000975776	0.000773023	0.000526598	0.0110049	0.0223179	0.00309077	-	0.00244044	0.000418164	0.00183122	0.00493349	0.000395676	0.000806017	0.00778323
F	0.000972518	0.000240876	0.000200476	0.000142173	0.000409862	0.000195729	0.00025123	0.000221699	0.000885225	0.00273858	0.00972519	0.000293887	0.00123843	-	0.000394037	0.00202411	0.000559376	0.00117362	0.0121424	0.00245731
P	0.00664634	0.00159352	0.0004067	0.00128994	0.000112659	0.00182832	0.0021129	0.00108148	0.000907151	0.000258302	0.00191198	0.00184232	0.000178207	0.000330913	-	0.00598145	0.0025882	0.000106959	0.000406447	0.00119062
S	0.0155736	0.00287095	0.00828537	0.00326074	0.00144954	0.00201539	0.00218283	0.00595783	0.000964445	0.000825708	0.00158505	0.00319946	0.000513734	0.001119	0.00393754	-	0.0142462	0.000401841	0.00148057	0.000880012
T	0.00979989	0.0013002	0.00423222	0.0011405	0.000528247	0.00168054	0.00254768	0.00100272	0.000616722	0.00376914	0.00150175	0.00458841	0.00157699	0.000352351	0.0019413	0.0162321	-	8.50604e-05	0.000547736	0.00524905
W	0.000522694	0.0027296	0.00014993	0.000394805	0.000738405	0.000422594	0.000484776	0.00149624	0.000342129	0.000549239	0.00305898	0.000454894	0.00053641	0.00313531	0.000340247	0.00194184	0.000360754	-	0.00467576	0.0013815
Y	0.00111224	0.000894764	0.00226407	0.000990948	0.000560013	0.000446047	0.000607849	0.000460013	0.00504712	0.00108608	0.00183278	0.000440864	0.000445638	0.0132294	0.000527305	0.00291788	0.000947402	0.00190692	-	0.00119003
V	0.00926811	0.000590631	0.000409129	0.000463466	0.00103196	0.000590161	0.001823	0.000831397	0.000154221	0.020217	0.00827765	0.00101044	0.00214109	0.00133209	0.000768547	0.000862911	0.00451733	0.000280329	0.0005921	-

[truncated: 48 more sheets: rtREV+G+I+F, rtREV+G+F, JTT+G+I+F, JTT+G+I, JTT+G+F, JTT+G, rtREV+G+I, rtREV+G, Dayhoff+G+I+F, Dayhoff+G+F, Dayhoff+G+I, Dayhoff+G, mtREV24+G+I+F, mtREV24+G+F, cpREV+G+F, cpREV+G, WAG+I+F, WAG+I, WAG+F, WAG …]
