# Supplementary material for: Putative carboxylesterase gene identification and their expression patterns in Hyphantria cunea (Drury)
Source: PeerJ. 2021 Mar 2;9:e10919. doi: 10.7717/peerj.10919 (PMC7934681; doi:10.7717/peerj.10919)
Supplement: Supplemental Information 11 [file peerj-09-10919-s011.xlsx]

## Sheet: sheet 1
RT-qPCR	The relative expressions of mRNA of each gene (mean ± SD)
Tissue	Leg				Wing				Female-antenna				Male-antenna
Gene Name	Rep. 1	Rep. 2	Rep.3		Rep. 1	Rep. 2	Rep.3		Rep. 1	Rep. 2	Rep.3		Rep. 1	Rep. 2	Rep.3
CXE1	0.0120216	0.00506284	0.00146086		0.00788235	0.00553582	0.0107895		0.059263	0.0676094	0.0458826		0.0223341	0.0227388	0.0299633
CXE2	0.214598	0.0847908	0.0770833		0.245629	0.179009	0.20052		0.0693395	0.0454767	0.0577109		0.029521	0.0571241	0.053295
CXE3	0.0801847	0.0460018	0.0357935		0.0636717	0.0365224	0.0363285		0.0804262	0.0777938	0.0726563		0.0325415	0.0228644	0.0225343
CXE4	0.00668712	0.00375763	0.00279455		0.0025248	0.00223481	0.00213503		0.492548	0.291814	0.298456		0.424735	0.543876	0.402289
CXE5	0.203442	0.104	0.0959478		0.0228623	0.0202665	0.0200198		0.345249	0.27991	0.383		0.34782	0.269529	0.3043
CXE6	0.00518755	0.00131331	0.00275541		0.00246386	0.00339264	0.00284465		0.0299146	0.078293	0.0901449		0.0702921	0.0778722	0.0489443
CXE7	0.463631	0.218111	0.172706		0.090826	0.0748636	0.0815122		0.0525041	0.0588755	0.0172525		0.0276481	0.0285681	0.0328874
CXE8	0.706951	0.288148	0.174616		0.282174	0.206561	0.256817		0.332637	0.436768	0.428095		0.395184	0.365384	0.410132
CXE9	0.0306596	0.00948919	0.00818129		0.00832535	0.0100152	0.013539		0.0185233	0.0177725	0.0200326		0.04249	0.0355504	0.0446582
CXE10	0.00178016	0.00123929	0.00107319		0.00104004	0.000968165	0.000820162		0.0172795	0.0240688	0.0159892		0.0483713	0.0294665	0.0380027
Note: quantitative value= the relative expressions of mRNA of each gene (mean ± SD)
Rep.1/2/3: Biological repetition 1/2/3/
