# Supplementary figures and images for: Putative carboxylesterase gene identification and their expression patterns in Hyphantria cunea (Drury)
Source: PeerJ journal article supplement (doi:10.7717/peerj.10919), 2021-03-02

EF1-a

1 2 3 4 5

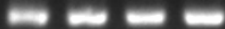

L1: Thoraxes

L2: Abdomens

L3: Pupae

L4: Larvae

L5: Negative control

Supplement: Raw_data_supplementary_material_2.zip [file Raw_data_supplementary_material_2.zip]
